# Supplementary material for: Hamp1 but not Hamp2 regulates ferroportin in fish with two functionally distinct hepcidin types
Source: PubMed Central journal article supplement (PMC5665920; doi:10.1038/s41598-017-14933-5), 2017-11-01
Supplement: 41598_2017_14933_MOESM1_ESM.pdf [file 41598_2017_14933_MOESM1_ESM.pdf]

## **Hamp1 but not Hamp2 regulates ferroportin in fish with two functionally distinct hepcidin types**

João V Neves<sup>1,2,\*</sup>, Miguel F Ramos<sup>1,2</sup>, Ana C Moreira<sup>1,2</sup>, Tânia Silva<sup>1,2</sup>, Maria S Gomes<sup>1,2,3</sup>, Pedro NS Rodrigues<sup>1,2,3</sup>

<sup>1</sup> i3S - Instituto de Investigação e Inovação em Saúde, Universidade do Porto, Portugal, Rua Alfredo Allen 208, 4200-135 Porto, Portugal

<sup>2</sup> IBMC – Instituto de Biologia Molecular e Celular, Universidade do Porto, Rua Alfredo Allen 208, 4200-135 Porto, Portugal

<sup>3</sup> ICBAS - Instituto de Ciências Biomédicas Abel Salazar, Universidade do Porto, Rua de Jorge Viterbo Ferreira 228, 4050-313 Porto, Portugal

\* Corresponding author:

João V Neves

Iron and Innate Immunity

i3S - Instituto de Investigação e Inovação em Saúde, Rua Alfredo Allen 208, 4200-135 Porto,  
PORTUGAL

Tel: +351220408800

E-mail: [jneves@ibmc.up.pt](mailto:jneves@ibmc.up.pt)





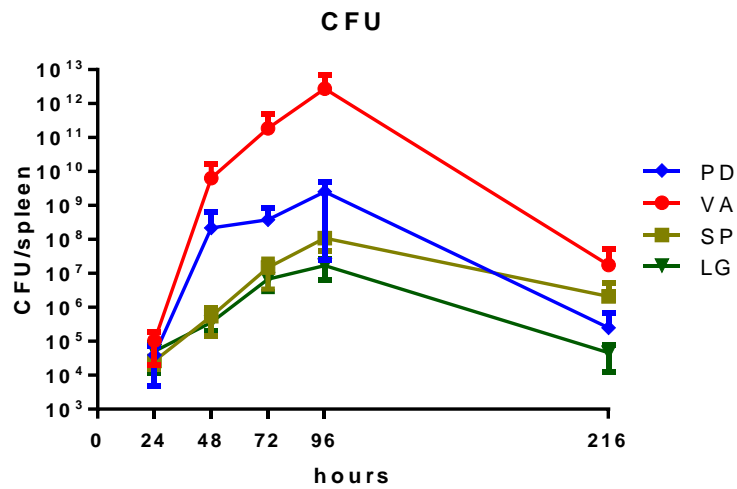

**Supplementary Figure 3 – CFU counts in the spleen.** Values are expressed as means  $\pm$  S.D. (n=4). Counts were performed at 24, 48, 72, 96 and 216 hours post-infection. PD – *Photobacterium damsela* ssp *piscicida*, VA – *Vibrio anguillarum*, SP - *Streptococcus parauberis*, LG – *Lactococcus garvieae*.

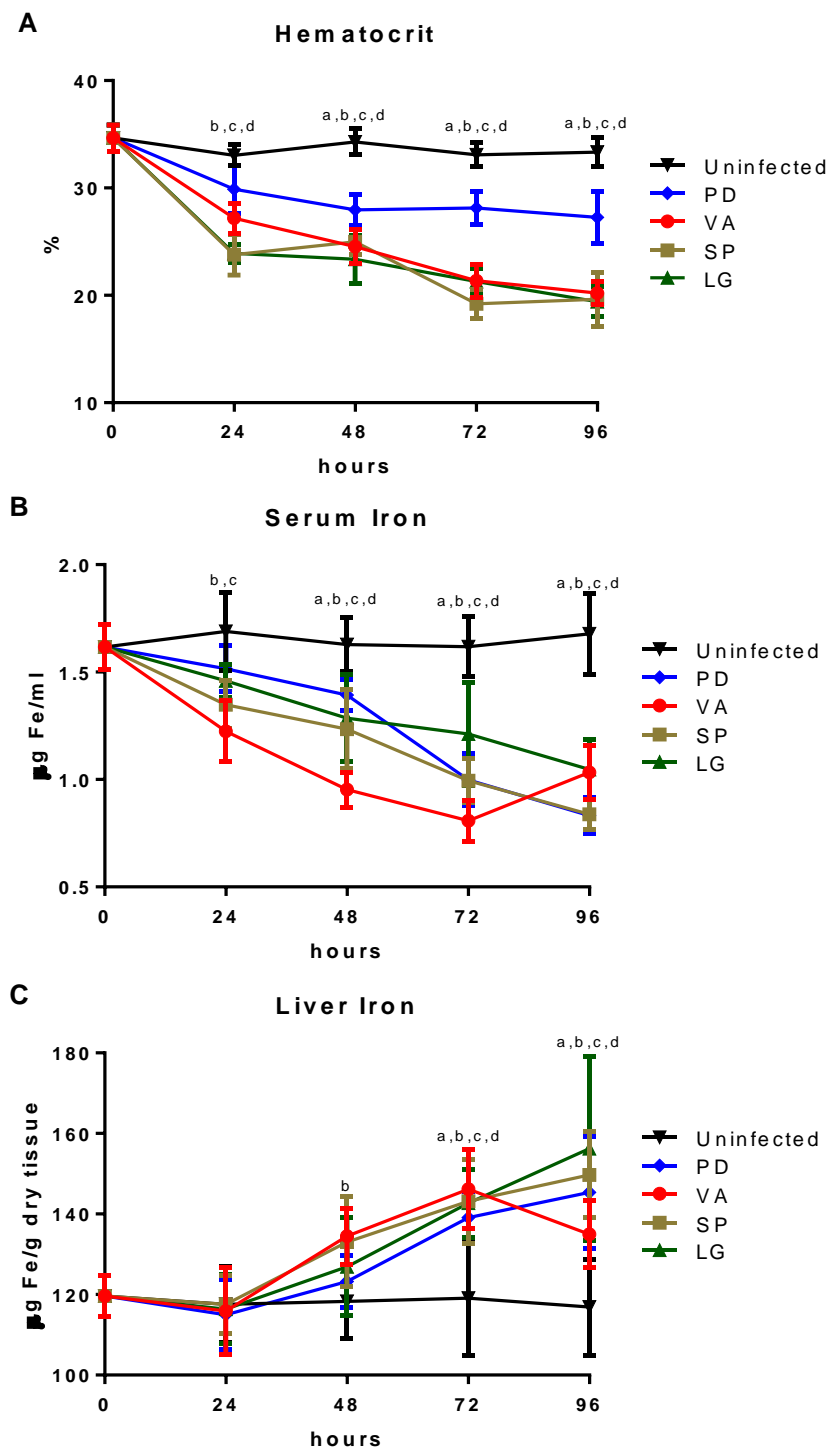

**Supplementary Figure 4 - Hematological parameters and liver iron content in infected fish.** (A) hematocrit, (B) serum iron and (C) liver iron. Values are expressed as means  $\pm$  S.D. (n=4). Samples were collected at 24, 48, 72 and 96 hours post-infection. Untreated fish were used as a 0-day control (n=4). Differences from the controls were considered significant for \* $p < 0.05$  as (a) PD – *Photobacterium damsela* ssp *piscicida*, (b) VA – *Vibrio anguillarum*, (c) SP - *Streptococcus parauberis* and (d) LG – *Lactococcus garvieae*.

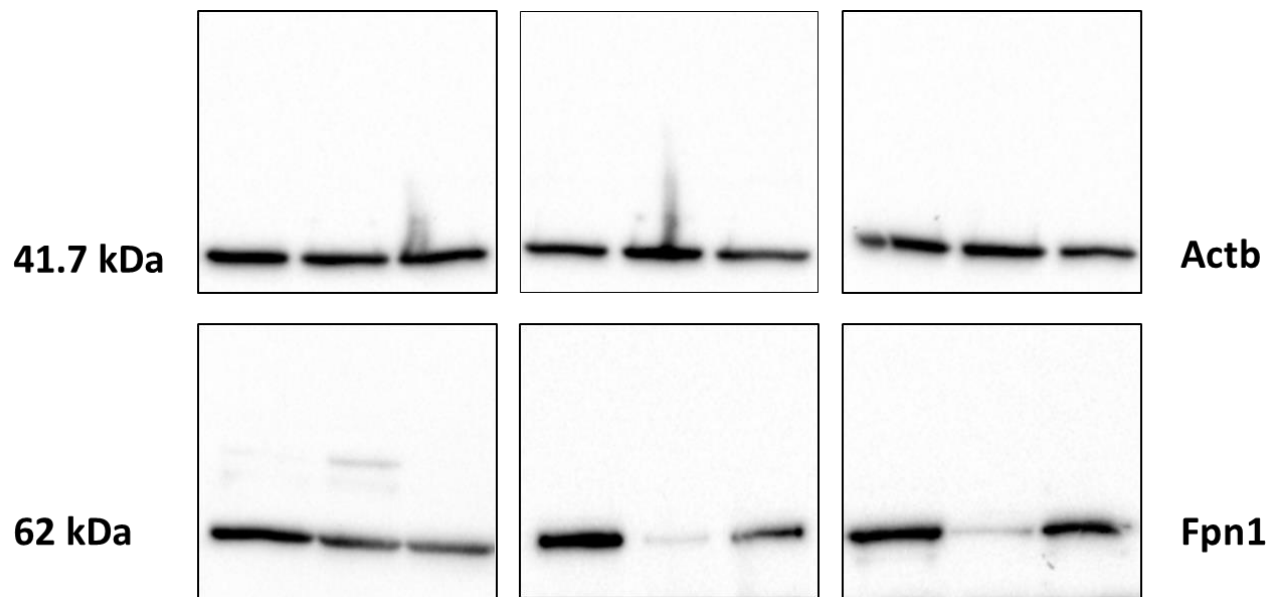

**Supplementary Figure 5** - Uncropped Western blot membranes presented in cropped form in figure

8.

**Supplementary Table 1 - Genomic comparison of sea bass ferroportin with other vertebrate and invertebrate species.**

|                               | Exon 1 |      | Exon 2 |       | Exon 3 |      | Exon 4 |      | Exon 5 |      | Exon 6 |      | Exon 7 |      | Exon 8 |      |        |  |
|-------------------------------|--------|------|--------|-------|--------|------|--------|------|--------|------|--------|------|--------|------|--------|------|--------|--|
| <i>Dicentrarchus labrax</i>   | 34     | 542  | 68     | 365   | 160    | 390  | 116    | 2132 | 127    | 310  | 246    | 122  | 639    | 442  | 317    |      |        |  |
| <i>Gasterosteus aculeatus</i> | 43     | 282  | 68     | 363   | 160    | 241  | 116    | 1408 | 127    | 317  | 246    | 117  | 627    | 401  | 317    |      |        |  |
| <i>Oreochromis niloticus</i>  | ?      | 303  | 68     | 501   | 160    | 333  | 116    | 1030 | 127    | 638  | 246    | ?    | ?      | 848  | 323    |      |        |  |
| <i>Oryzias latipes</i>        | ?      | 35   | 56     | 382   | 160    | 208  | 116    | 1701 | 127    | 363  | 249    | 105  | 627    | 332  | ?      |      |        |  |
| <i>Tetraodon nigroviridis</i> | 49     | 106  | 68     | 258   | 160    | 107  | 116    | 1206 | 127    | 869  | 246    | 113  | 636    | 227  | 317    |      |        |  |
| <i>Takifugu rubripes</i>      | 43     | 94   | 68     | 240   | 160    | 159  | 116    | 831  | 127    | ?    | ?      | 79   | 639    | 376  | 317    |      |        |  |
| <i>Danio rerio</i>            | 34     | 116  | 69     | 1790  | 160    | 192  | 116    | 1098 | 127    | 769  | 249    | 1168 | 621    | 1839 | 314    |      |        |  |
| <i>Xenopus tropicalis</i>     | 40     | 83   | 68     | 5325  | 160    | 555  | 116    | 2018 | 127    | 486  | 243    | 3541 | 657    | 1903 | 320    |      |        |  |
| <i>Anolis carolinensis</i>    | 49     | 7767 | 68     | 10341 | 160    | 2859 | 116    | 197  | 127    | 2115 | 246    | 1923 | 657    | 2907 | 320    |      |        |  |
| <i>Gallus gallus</i>          | 46     | ?    | 68     | 4167  | 160    | 829  | 116    | 271  | 127    | 3079 | 243    | 485  | 666    | 961  | 320    |      |        |  |
| <i>Mus musculus</i>           | 43     | 436  | 68     | 3401  | 160    | 2155 | 116    | 449  | 127    | 5827 | 246    | 705  | 639    | 1172 | 314    |      |        |  |
| <i>Homo sapiens</i>           | 43     | 537  | 68     | 4492  | 160    | 2199 | 116    | 1004 | 127    | 6115 | 246    | 1128 | 642    | 1392 | 314    |      |        |  |
| <i>Caenorhabditis elegans</i> | 60     | 370  | 154    | 592   | 222    | 52   | 88     | 121  | 119    | 160  | 131    | 46   | 252    | 542  | 357    | 1322 | 147    |  |
|                               | Exon 1 |      | Exon 2 |       | Exon 3 |      | Exon 4 |      | Exon 5 |      | Exon 6 |      | Exon 7 |      | Exon 8 |      | Exon 9 |  |

Among vertebrates, there is a high degree of conservation in both genomic structure, comprised by 8 exons and 7 introns, and exon sizes. Intron sizes are significantly variable, with tetrapods as usual presenting the bigger ones. Question marks (?) represent regions where available sequence was considered unreliable.
